# Supplementary material for: A Comprehensive Survey of Small-Molecule Binding Pockets in Proteins
Source: PLoS Comput Biol. 2013 Oct 24;9(10):e1003302. doi: 10.1371/journal.pcbi.1003302 (PMC3812058; doi:10.1371/journal.pcbi.1003302)
Supplement: Table S1 — Significance of the PS-score for protein pockets of various lengths. (DOCX) [file pcbi.1003302.s002.docx]

**Table S1.** Significance of the PS-score for protein pockets of various lengths.

| PS-score | *P*-value | | | | |
| --- | --- | --- | --- | --- | --- |
| **15 AAs** | **25 AAs** | **35 AAs** | **45 AAs** | **55 AAs** |
| 0.35 | 1.23×10-1 | 8.57×10-2 | 6.21×10-2 | 4.59×10-2 | 3.42×10-2 |
| 0.36 | 7.78×10-2 | 4.95×10-2 | 3.32×10-2 | 2.29×10-2 | 1.60×10-2 |
| 0.38 | 3.03×10-2 | 1.62×10-2 | 9.35×10-3 | 5.61×10-3 | 3.43×10-3 |
| 0.40 | 1.16×10-2 | 5.22×10-3 | 2.61×10-3 | 1.37×10-3 | 7.34×10-4 |
| 0.45 | 1.03×10-3 | 3.06×10-4 | 1.06×10-4 | 3.99×10-5 | 1.55×10-5 |
| 0.50 | 9.13×10-5 | 1.79×10-5 | 4.34×10-6 | 1.16×10-6 | 3.26×10-7 |
| 0.55 | 8.08×10-6 | 1.05×10-6 | 1.77×10-7 | 3.38×10-8 | 6.88×10-9 |
| 0.60 | 7.15×10-7 | 6.11×10-8 | 7.20×10-9 | 9.85×10-10 | 1.45×10-10 |
